# Supplementary material
Source: PubMed Central journal article supplement (PMC6644994)
Supplement: ao8b00959_si_001.pdf [file ao8b00959_si_001.pdf]

# The chemical ligand space of cereblon

Iuliia Boichenko<sup>1†</sup>, Kerstin Bär<sup>1</sup>, Silvia Deiss<sup>1</sup>, Christopher Heim<sup>1</sup>, Reinhard Albrecht<sup>1</sup>,  
Andrei N. Lupas<sup>1</sup>, Birte Hernandez Alvarez<sup>1,\*</sup>, and Marcus D. Hartmann<sup>1,\*</sup>

<sup>1</sup> Department of Protein Evolution, Max Planck Institute for Developmental Biology, Max-Planck-Ring  
5, 72076 Tübingen, Germany

<sup>†</sup> Current address: Laboratory of Biophysical Chemistry of Macromolecules, Ecole polytechnique  
fédérale de Lausanne, CH-1015 Lausanne, Switzerland

\* Corresponding authors

E-mail: birte.hernandez@tuebingen.mpg.de (BHA) or marcus.hartmann@tuebingen.mpg.de (MDH)

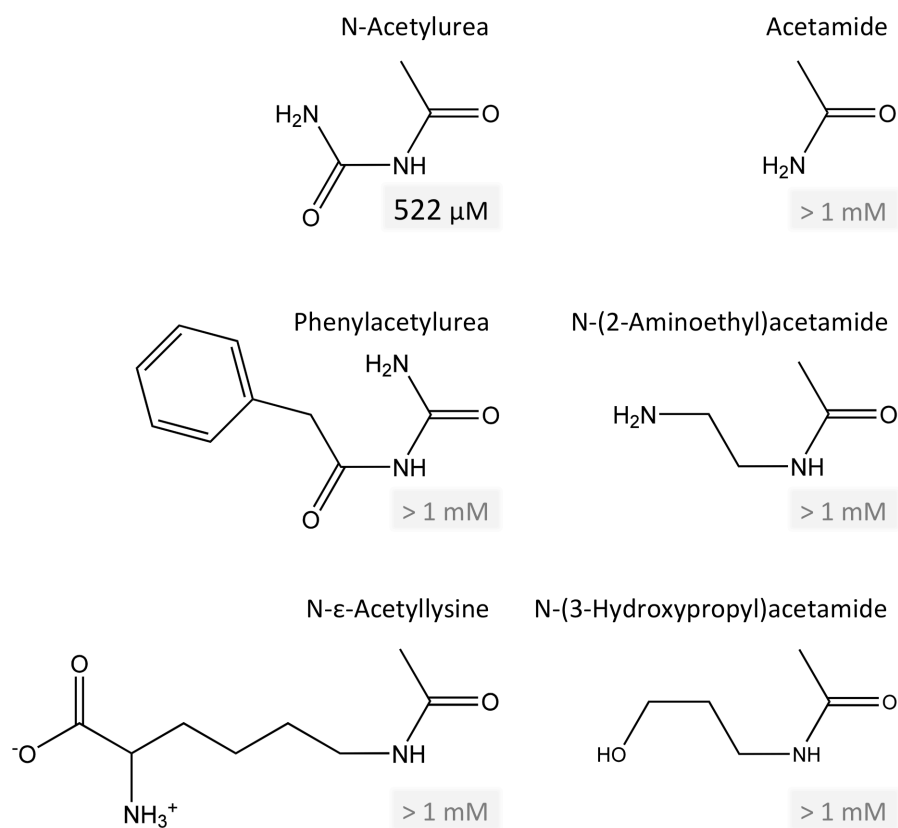

**Figure S1**

Non-cyclic compounds. Of all tested linear compounds, only acetylurea showed detectable binding to MsCl4.

|                   |     |                                  |     |
|-------------------|-----|----------------------------------|-----|
| <i>MsCI4</i>      | 1   | MPLDA-----GGQ---NSTQ             | 12  |
| <i>CRBN_HUMAN</i> | 288 | LPIDDLVLRIQLLKIGSAIQRLRCE        | 311 |
| <i>MsCI4</i>      | 13  | MVLAPGASIFRCRQCQTISR---          | 33  |
| <i>CRBN_HUMAN</i> | 312 | LDIMNKCTSLCKQCQETEITTKN          | 335 |
| <i>MsCI4</i>      | 34  | RDWLLPMGGDHEHVFN <b>PAGMIFR</b>  | 57  |
| <i>CRBN_HUMAN</i> | 336 | EIFSLSLCGP-MAAYVNP <b>HGYVHE</b> | 358 |
| <i>MsCI4</i>      | 58  | VWCFSLAQGLRLIGAPSGE <b>FSWFK</b> | 81  |
| <i>CRBN_HUMAN</i> | 359 | TLTVYKACNLNLIGRPSTE <b>HSWFP</b> | 382 |
| <i>MsCI4</i>      | 82  | GYDWTIALCGQCGSHLGWH <b>YEGG-</b> | 104 |
| <i>CRBN_HUMAN</i> | 383 | GYAWTVAQCKICASHIGWK <b>FTATK</b> | 406 |
| <i>MsCI4</i>      | 105 | --SQPQ <b>TF</b> FGLIKDRLAEGPAD  | 124 |
| <i>CRBN_HUMAN</i> | 407 | KDMSPQ <b>KFW</b> GLTRSALLPTIPD  | 428 |

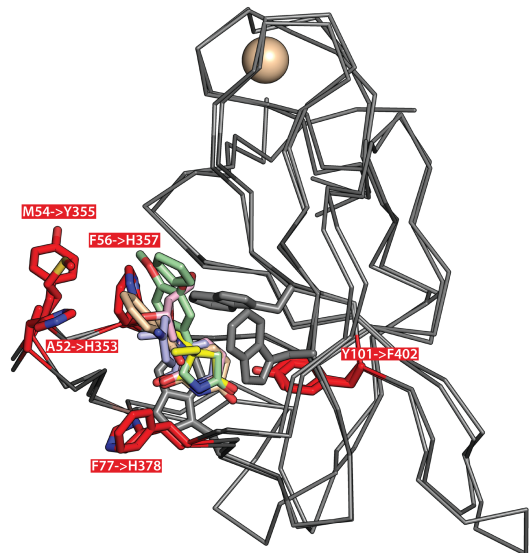

## Figure S2

Sequence alignment and structural superposition of human cereblon and MsCI4 in complex with the effectors ethosuximide (yellow), deoxyuridine (pink), aminoglutethimide (blue), thalidomide (brown) and rolipram (green), highlighting species-specific differences in the vicinity of the thalidomide-binding site. Non-conserved side chains within a 4Å radius around all atoms of all effectors are highlighted red. From the highlighted 5 substitutions, Y101 and F77 affect only the binding moiety and thus have the same effect on all effectors. The other three residues are in the 4Å sphere of the protruding moieties but do not interact with any of them.

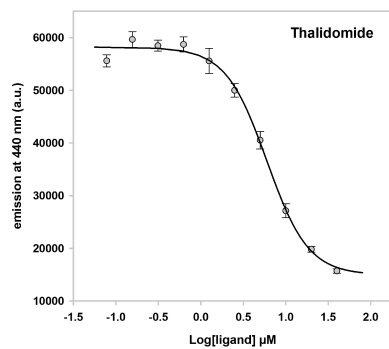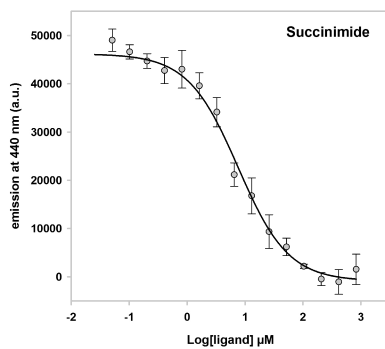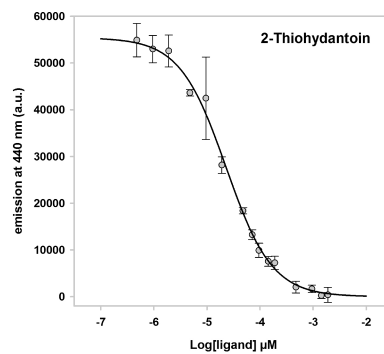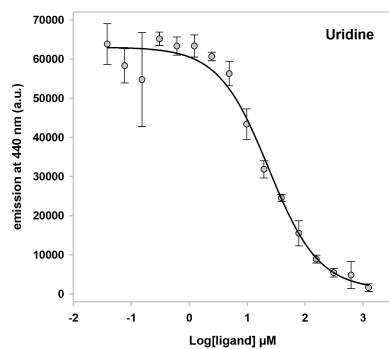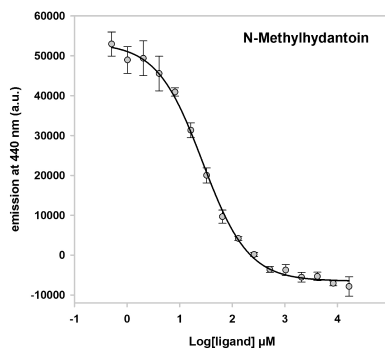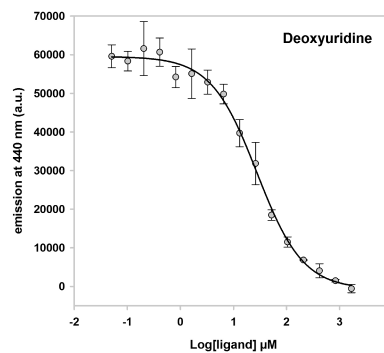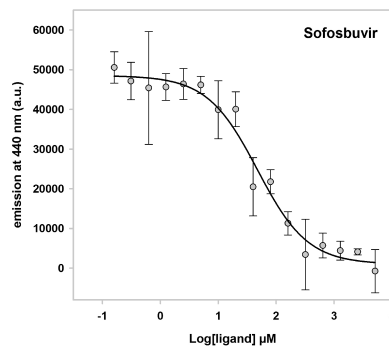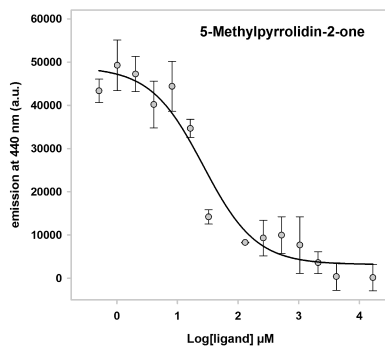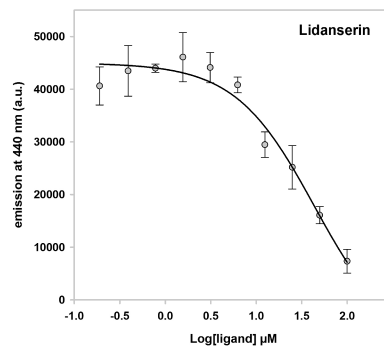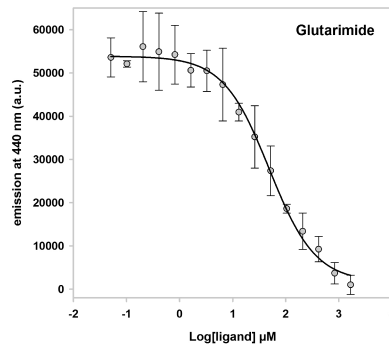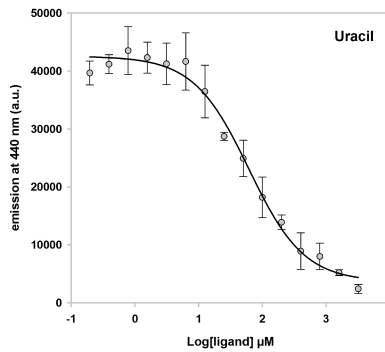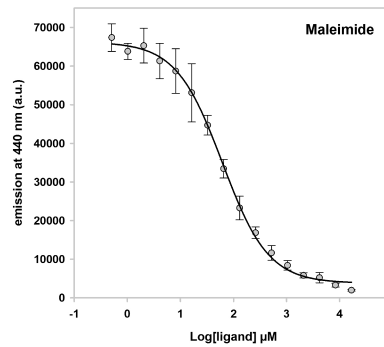

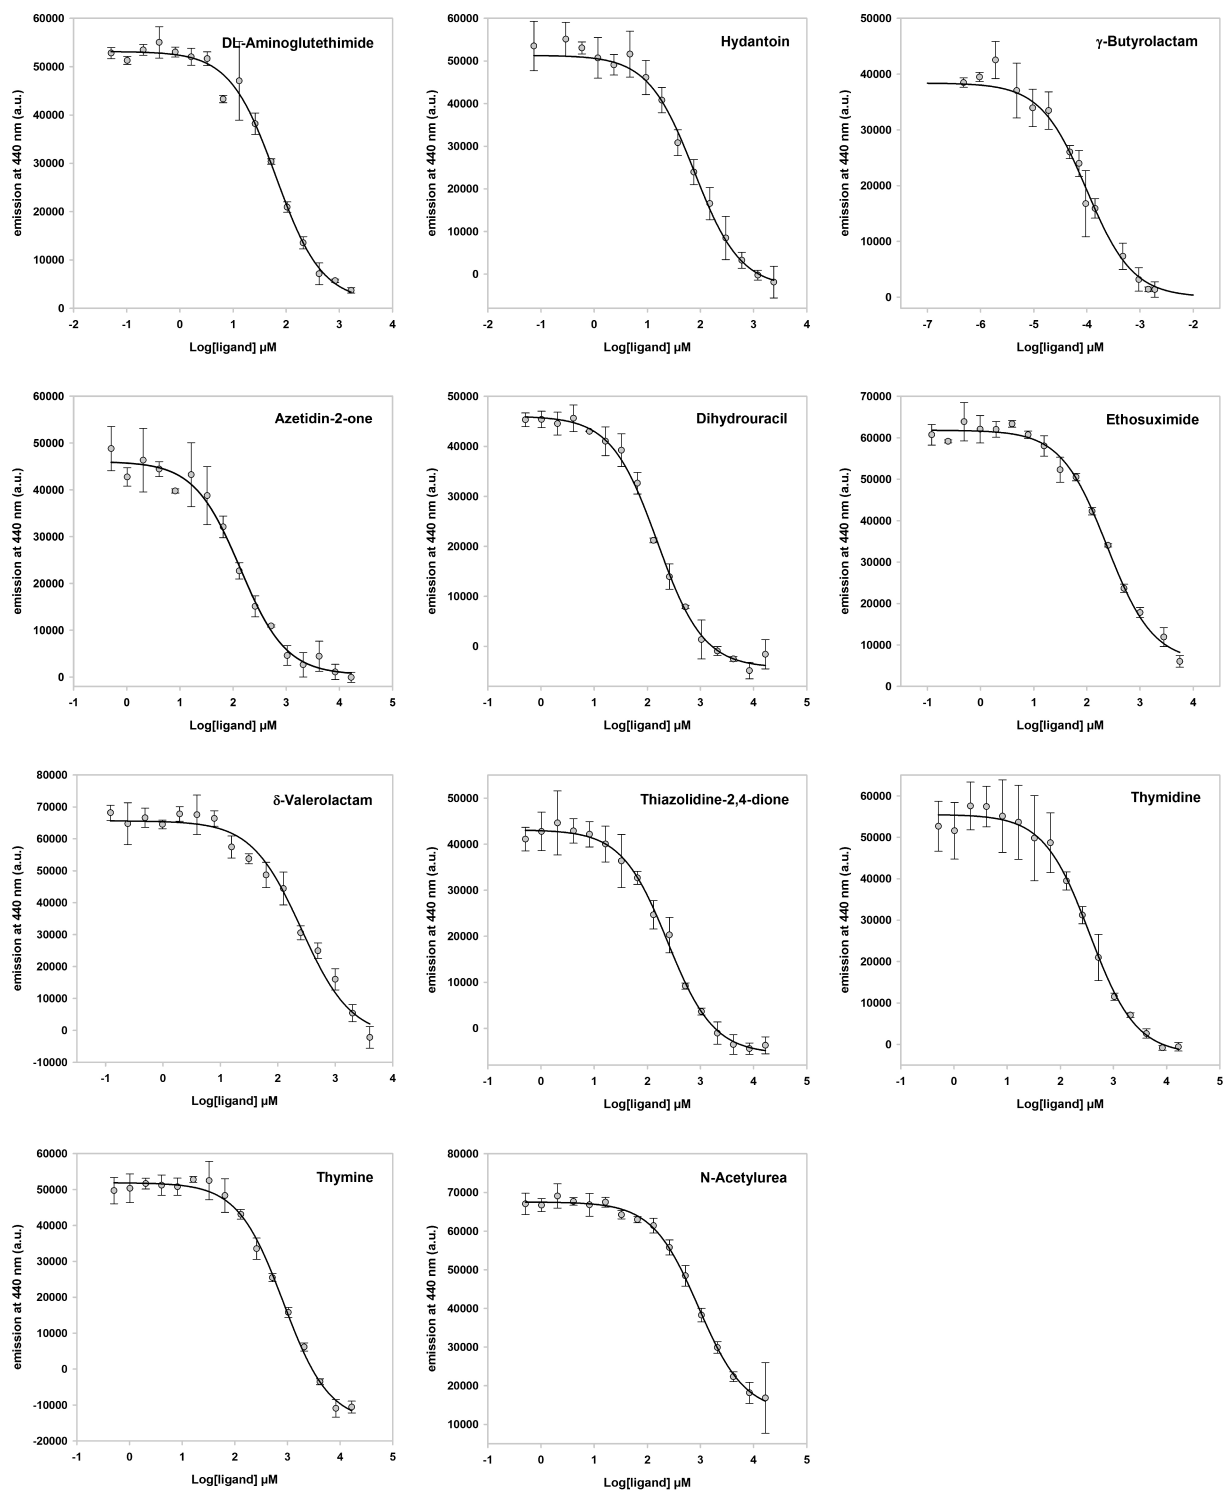

**Figure S3**

FRET curves for all identified binders.

| <b>Substance</b>                                     | <b>Ki [μM]</b> |
|------------------------------------------------------|----------------|
| <b>Succinimide</b> (Pyrrolidine-2,5-dione)           | 4.3 ± 0.5      |
| <b>(±)-Thalidomide</b>                               | 4.4 ± 0.2      |
| <b>2-Thiohydantoin</b>                               | 13 ± 1.3       |
| <b>Uridine</b>                                       | 13 ± 1.9       |
| <b>Deoxyuridine</b>                                  | 15 ± 1.6       |
| <b>N-Methylhydantoin</b>                             | 16 ± 1.3       |
| <b>5-Methylpyrrolidin-2-one</b>                      | 19 ± 6.0       |
| <b>Sofosbuvir</b>                                    | 22 ± 4.4       |
| <b>Lidanserin</b>                                    | 25 ± 8.5       |
| <b>Glutarimide</b> (Piperidine-2,6-dione)            | 28 ± 5.0       |
| <b>Uracil</b> (Pyrimidine-2,4-dione)                 | 35 ± 5.1       |
| <b>Maleimide</b> (Pyrrol-2,5-dione)                  | 35 ± 3.1       |
| <b>DL-Aminoglutethimide</b>                          | 39 ± 3.8       |
| <b>Hydantoin</b> (Imidazolidine-2,4-dione)           | 43 ± 10.7      |
| <b>γ-Butyrolactam</b> (Pyrrolidin-2-one)             | 57 ± 11.6      |
| <b>Azetidin-2-one</b>                                | 77 ± 11.0      |
| <b>Dihydrouracil</b> (Hexahydropyrimidine-2,4-dione) | 88 ± 6.8       |
| <b>Ethosuximide</b> (3-Ethyl-3-methylsuccinimide)    | 136 ± 11.6     |
| <b>δ-Valerolactam</b> (Piperidin-2-one)              | 146 ± 20.3     |
| <b>Thiazolidine-2,4-dione</b>                        | 137 ± 15.9     |
| <b>Thymidine</b>                                     | 204 ± 34.5     |
| <b>Thymine</b> (5-Methylpyrimidine-2,4-dione)        | 478 ± 41.6     |
| <b>N-Acetylurea</b>                                  | 522 ± 53.5     |
| <b>Acetamide</b>                                     | > 1,000        |
| <b>1-Azo-2-Cyclooctanone</b>                         | > 1,000        |
| <b>Barbiturate</b>                                   | > 1,000        |
| <b>Creatinine</b> (2-Imino-N-methylhydantoin)        | > 1,000        |
| <b>Cycloheximide</b>                                 | > 1,000        |
| <b>Cytosine</b>                                      | > 1,000        |
| <b>5,5-Dimethyl-oxazolidine-2,4-dione</b>            | > 1,000        |
| <b>ε-Caprolactam</b>                                 | > 1,000        |

|                                             |              |
|---------------------------------------------|--------------|
| <b>5-Ethyl-5-methyl-hydantoin</b>           | > 1,000      |
| <b><math>\gamma</math>-Butyrolactone</b>    | > 1,000      |
| <b>Glutaric Anhydride</b>                   | > 1,000      |
| <b>N-(2-Aminoethyl)acetamide</b>            | > 1,000      |
| <b>N-<math>\epsilon</math>-Acetyllysine</b> | > 1,000      |
| <b>N-(2-Hydroxypropyl)acetamide</b>         | > 1,000      |
| <b>Phenylacetylurea</b>                     | > 1,000      |
| <b>Piperidine</b>                           | > 1,000      |
| <b>Pseudouridine</b>                        | > 1,000      |
| <b>Pyrrolidine</b>                          | > 1,000      |
| <b>Pyrrolidine-2-thione</b>                 | > 1,000      |
| <b>Succinic Anhydride</b>                   | > 1,000      |
| <b>Dasabuvir</b>                            | n.d.         |
| <b>Dantrolene</b>                           | n.d.         |
| <b>Dexetimide</b>                           | n.d.         |
| <b>Glutethimide</b>                         | unavailable  |
| <b>Nitrofurantoin</b>                       | n.d.         |
| <b>Oxazolidine-2,4-dione</b>                | unavailable  |
| <b>Rogletimide</b>                          | unavailable  |
| <b>Rolipram</b>                             | n.d. – X-tal |

**Table S1**

All substances addressed in this study, sorted by affinity for MsCl4.

n.d.: not determined due to solubility issues

X-tal: binding verified via crystallography

| Ligand                        | Amino-glutethimide        | $\gamma$ -Butyrolactam    | Etho-suximide             | Glutarimide               | Hydantoin                 | Rolipram                  | Thiazolidine-2,4-dione    | 2-Thiohydantoin           | $\delta$ -Valerolactam    |
|-------------------------------|---------------------------|---------------------------|---------------------------|---------------------------|---------------------------|---------------------------|---------------------------|---------------------------|---------------------------|
| <b>Data collection</b>        |                           |                           |                           |                           |                           |                           |                           |                           |                           |
| Cell dimensions $a, b, c$ (Å) | 56.8, 60.4, 88.5          | 56.9, 59.7 88.4           | 56.9, 59.8, 88.1          | 56.2, 59.7, 88.3          | 56.4, 58.5, 87.1          | 57.3, 59.5, 88.0          | 56.5, 59.9, 88.6          | 56.6, 59.9, 88.3          | 56.5, 59.6, 88.6          |
| Resolution (Å)                | 37.5 - 1.70 (1.80 - 1.70) | 37.4 - 1.90 (2.01 - 1.90) | 37.3 - 2.10 (2.22 - 2.10) | 37.1 - 2.30 (2.44 - 2.30) | 36.8 - 1.85 (1.96 - 1.85) | 37.4 - 1.95 (2.07 - 1.95) | 37.3 - 1.65 (1.75 - 1.65) | 37.3 - 1.55 (1.64 - 1.55) | 37.2 - 1.70 (1.80 - 1.70) |
| $R_{\text{merge}}$            | 4.3 (59.2)                | 5.4 (48.7)                | 6.5 (48.6)                | 8.0 (36.9)                | 6.1 (59.5)                | 7.6 (65.4)                | 5.8 (54.7)                | 4.7 (50.7)                | 4.7 (49.4)                |
| $I/\sigma I$                  | 15.4 (1.97)               | 12.5 (1.89)               | 13.4 (2.29)               | 8.64 (1.98)               | 12.6 (1.86)               | 10.8 (1.91)               | 10.1 (1.71)               | 13.8 (2.4)                | 13.3 (2.11)               |
| Completeness (%)              | 99.7 (99.2)               | 98.4 (96.7)               | 99.2 (97.1)               | 97.0 (94.0)               | 97.8 (94.6)               | 99.8 (99.4)               | 99.1 (97.5)               | 99.4 (98.5)               | 99.2 (97.7)               |
| Redundancy                    | 3.45 (3.42)               | 2.86 (2.81)               | 3.39 (3.24)               | 2.55 (2.52)               | 2.92 (2.87)               | 4.64 (4.63)               | 2.87 (2.68)               | 2.85 (3.39)               | 3.23 (3.20)               |
| <b>Refinement</b>             |                           |                           |                           |                           |                           |                           |                           |                           |                           |
| Resolution (Å)                | 37.5 - 1.70 (1.74 - 1.70) | 37.3 - 1.90 (1.95 - 1.90) | 37.3 - 2.10 (2.15 - 2.10) | 37.1 - 2.30 (2.36 - 2.30) | 35.0 - 1.85 (1.90 - 1.85) | 37.4 - 1.95 (2.0 - 1.95)  | 37.3 - 1.65 (1.69 - 1.65) | 37.3 - 1.55 (1.59 - 1.55) | 37.2 - 1.70 (1.74 - 1.70) |
| No. reflections               | 32512                     | 23182                     | 17207                     | 12940                     | 23726                     | 21463                     | 35109                     | 41911                     | 31914                     |
| $R_{\text{work}}$             | 0.17 (0.26)               | 0.18 (0.27)               | 0.18 (0.23)               | 0.19 (0.29)               | 0.16 (0.24)               | 0.18 (0.27)               | 0.17 (0.29)               | 0.16 (0.26)               | 0.17 (0.27)               |
| $R_{\text{free}}$             | 0.21 (0.27)               | 0.22 (0.31)               | 0.23 (0.25)               | 0.25 (0.35)               | 0.20 (0.30)               | 0.22 (0.30)               | 0.21 (0.26)               | 0.20 (0.33)               | 0.21 (0.26)               |
| Ligand in chain(s)            | C                         | A, B, C                   | A, B                      | A, B, C                   | A, B                      | A, B                      | A, B, C                   | A, B, C                   | A, B, C                   |
| PDB code                      | 5OH1                      | 5OH2                      | 5OH3                      | 5OH4                      | 5OH7                      | 5OH8                      | 5OH9                      | 5OHA                      | 5OHB                      |

**Table S2**

**Data collection and refinement statistics.** Highest resolution shells are shown in parenthesis.
